# Supplementary material for: Correction: The small and large ribosomal subunits depend on each other for stability and accumulation
Source: PubMed Central journal article supplement (PMC6681130; doi:10.26508/lsa.201900508), 2019-08-01
Supplement: LSA-2019-00508_TableS1.pdf [file LSA-2019-00508_TableS1.pdf]

Table S1. Strains used

| Strain name | Gene expressed from GAL promoter                                   | Protein expressed from GAL promoter                                                                      | Chromosomal genotype                                                                                   | Plasmid                | Reference                           |
|-------------|--------------------------------------------------------------------|----------------------------------------------------------------------------------------------------------|--------------------------------------------------------------------------------------------------------|------------------------|-------------------------------------|
| BY4741      | None                                                               | None                                                                                                     | Mata; his3Δ1; leu2Δ0; lys2Δ0; ura3Δ0                                                                   | None                   | Ferreira-Cerca <i>et al.</i> , 2005 |
| Y699        | <i>RPS5</i>                                                        | uS7/S5                                                                                                   | his3Δ1; leu2Δ0; lys2Δ0; ura3Δ0; YJR123w::KanMX4                                                        | Ycplac111 Pgal-RPS5    | Ferreira-Cerca <i>et al.</i> , 2005 |
| Y259        | <i>RPS9A</i>                                                       | uS4/S9                                                                                                   | his3Δ1; leu2Δ0; ura3Δ0; YBR189w::KanMX4; YPL081w::HIS3                                                 | Ycplac111 Pgal-RPS9A   | Ferreira-Cerca <i>et al.</i> , 2005 |
| Y325        | <i>RPS11A</i>                                                      | uS17/S11                                                                                                 | his3Δ1; leu2Δ0; ura3Δ0; YBR048w::KanMX4; YDR025w::HIS3                                                 | Ycplac111-pGAL-RPS11A  | Ferreira-Cerca <i>et al.</i> , 2005 |
| Y399        | <i>RPSS14A</i>                                                     | uS11/S14                                                                                                 | his3Δ1; leu2Δ0; ura3Δ0; YJL191w::KanMX4; YCR031c::HIS3MX6                                              | Ycplac111 Pgal-RPS14A  | Ferreira-Cerca <i>et al.</i> , 2005 |
| Y1198       | <i>RPS20</i>                                                       | uS10/S20                                                                                                 | his3Δ1; leu2Δ0; LYS2; met15Δ0; ura3Δ0; YHL015w::kanMX4                                                 | Ycplac111 Pgal-RPS20   | Ferreira-Cerca <i>et al.</i> , 2005 |
| Y336        | <i>RPS31</i>                                                       | eS31/S31                                                                                                 | his3Δ1; leu2Δ0; ura3Δ0; MET15; lys2Δ0; YLR167w::KanMX4                                                 | Ycplac111 Pgal-RPS31   | Ferreira-Cerca <i>et al.</i> , 2005 |
| JWY8402     | <i>RPL4A</i>                                                       | uL4/L4                                                                                                   | ura3-52/trp1-101/lys2-801/his3-d200/leu2-d1/rpl4b::KANMX6/GAL-3HA-RPL4A (TRP1)                         | None                   | Pöll <i>et al.</i> , 2009           |
| YLL2083     | <i>RPL4B</i>                                                       | uL4/L4                                                                                                   | ade2-101, his3Δ200, ura3-52, lys2 rpl4AΔ::KAN RPL4BΔ::lox pGAL-RPL4, HIS3                              | pGAL-RPL4B             | Thapa <i>et al</i> 2013             |
| Y1092       | <i>RPL5</i>                                                        | uL11/L5                                                                                                  | his3-1/leu2-0/ura3-0/YPL131w::KANMX4                                                                   | Ycplac111 Pgal-RPL5    | Pöll <i>et al.</i> , 2009           |
| Y1095       | <i>RPL17A</i>                                                      | uL22/L17                                                                                                 | his3-1/leu2-0/ura3-0/YKL180w::KANMX4/YJL177w::HIS3MX6                                                  | Ycplac111 Pgal-RPL17A  | Pöll <i>et al.</i> , 2009           |
| Y1101       | <i>RPL40A</i>                                                      | eL40/L40                                                                                                 | his3-1/leu2-0/ura3-0/YIL148w::HIS3MX6/YKR094c::KANMX4                                                  | Ycplac111 Pgal-RPL40A* | Pöll <i>et al.</i> , 2009           |
| Y1103       | <i>RPL43A</i>                                                      | eL43/L43                                                                                                 | his3-1/leu2-0/ura3-0/YJR094w-a::HIS3MX6/YPR043w::KANMX4                                                | Ycplac111 Pgal-RPL43A  | Pöll <i>et al.</i> , 2009           |
| JWY8110     | <i>RPF2</i>                                                        | Rpf2                                                                                                     | Mata; trp1; lys2-801; ura3-5;2 his3delta200; pep4::HIS3; prb1Δ1.6R; can; rpf2::GAL-HA3-RPF2 TRP1       | None                   | Zhang <i>et al.</i> 2007            |
| JWY8111     | <i>RRS1</i>                                                        | Rrs1                                                                                                     | Mata; trp1; lys2-801; ura3-52; his3delta200; pep4::HIS3; prb1; delra1.6R; can; rrs1::GAL-HA3-RRS1 TRP1 | None                   | Zhang <i>et al.</i> 2007            |
| YJP57       | <i>RRP7</i>                                                        | Rrp7                                                                                                     | MATA, ade2, his3, leu2, trp1, ura3, KANMX6-GAL::HA-rrp7, nan1-MYC::HIS3                                | None                   | Perez-Fernandez <i>et al.</i> 2007  |
| YLL2500     | <i>uS17/S11; RPL25</i> expressed from estradiol inducible promoter | <i>uS17/S11</i> expressed from Pgal; <i>uL23-GFP/L25-GFP</i> expressed from estradiol inducible promoter | his3Δ1; leu2Δ0; ura3Δ0; YBR048w::KanMX4; YDR025w::HIS3; ade2::Z3EV; URA3::PNM3-uL23::GFP               | Ycplac111 Pgal RPS17   | This paper                          |

\* Includes the Rpl40 domain only, not the ubiquitin domain
